# Supplementary material
Source: PubMed Central journal article supplement (PMC9724663)

## Expanded View Figures

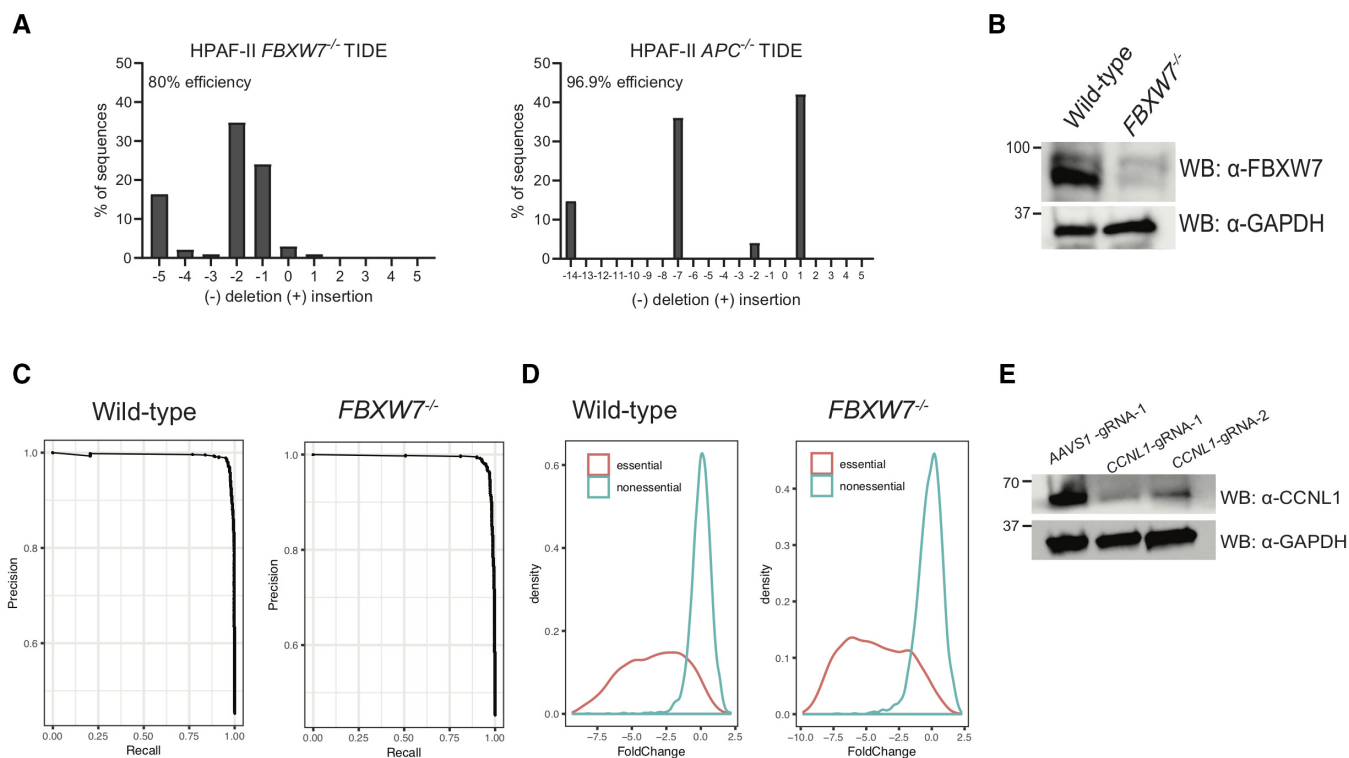

**Figure EV1. Verification of *FBXW7* and *APC* knockout & genome-wide screen quality control.**

- A TIDE analysis of HPAF-II *FBXW7*<sup>-/-</sup> cell line and HPAF-II *APC*<sup>-/-</sup> cell line.
- B Immunoblot of lysates extracted from HPAF-II *FBXW7*<sup>-/-</sup> cell lines demonstrating knockout of *FBXW7* protein expression.
- C Fold-change plots of HPAF-II wild-type and *FBXW7*<sup>-/-</sup> genome-wide screens demonstrating a change in essential genes at T24 of the screen.
- D Precision-recall curves of HPAF-II wild-type and *FBXW7*<sup>-/-</sup> genome-wide screens demonstrating training sets of essential and nonessential genes performed appropriately in the BAGEL algorithm.
- E Immunoblot of lysates extracted from *FBXW7*<sup>-/-</sup> cells following treatment with gRNAs targeting *CCNL1*.

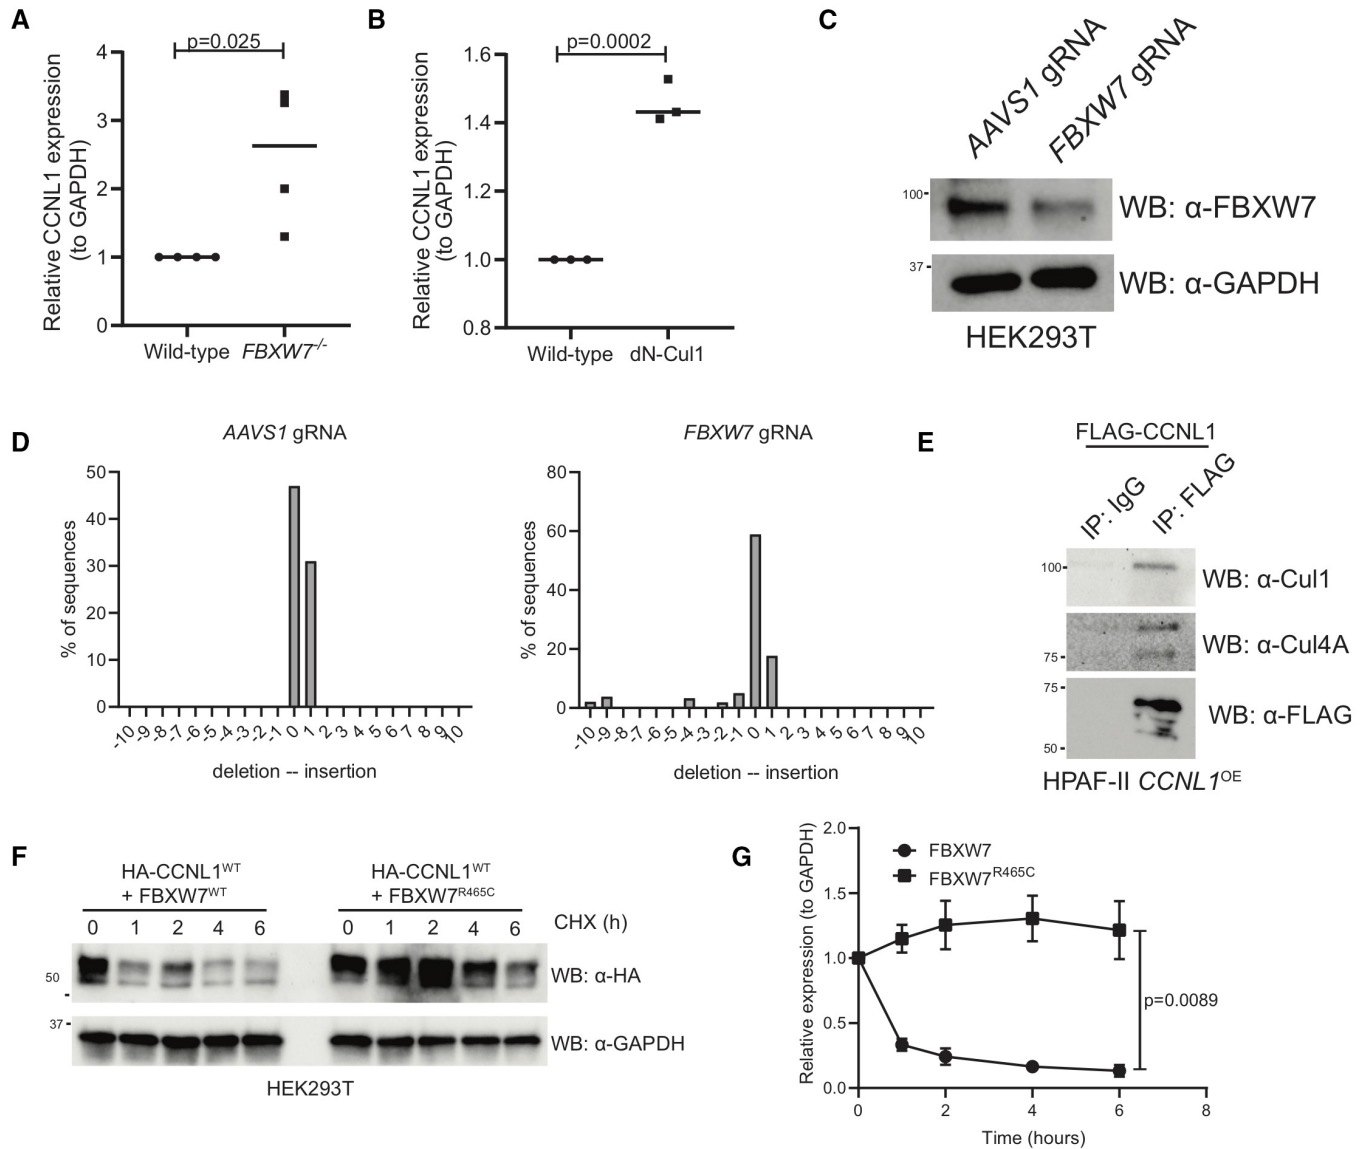

**Figure EV2. CCNL1 degradation requires Cul1 and is blocked when substrate-binding deficient *FBXW7*<sup>R465C</sup> is co-expressed.**

A Quantification of immunoblots in Fig 3A, mean  $\pm$  SEM, students *t*-test,  $n = 3$  independent biological replicates.

B Quantification of immunoblots in Fig 3D, mean  $\pm$  SEM, students *t*-test,  $n = 3$  independent biological replicates.

C Immunoblot analysis of HEK293T cells expressing gRNAs against AAVS1 or *FBXW7*.

D TIDE analysis of HEK293T cells expressing gRNAs against AAVS1 or *FBXW7*.

E Immunoblot of immunoprecipitation of FLAG-CCNL1 overexpressed in HPAF-II cells, detecting endogenous Cul1 and Cul4A. Representative image of three independent replicates.

F Immunoblot of lysates following cycloheximide treatment of HEK293T cells expressing HA-CCNL1 and FLAG-FBXW7 or FLAG-FBXW7<sup>R465C</sup>. Representative blot of three independent replicates.

G Quantification of cycloheximide chase in (F), mean  $\pm$  SEM of three independent replicates, *t*-test at T6.

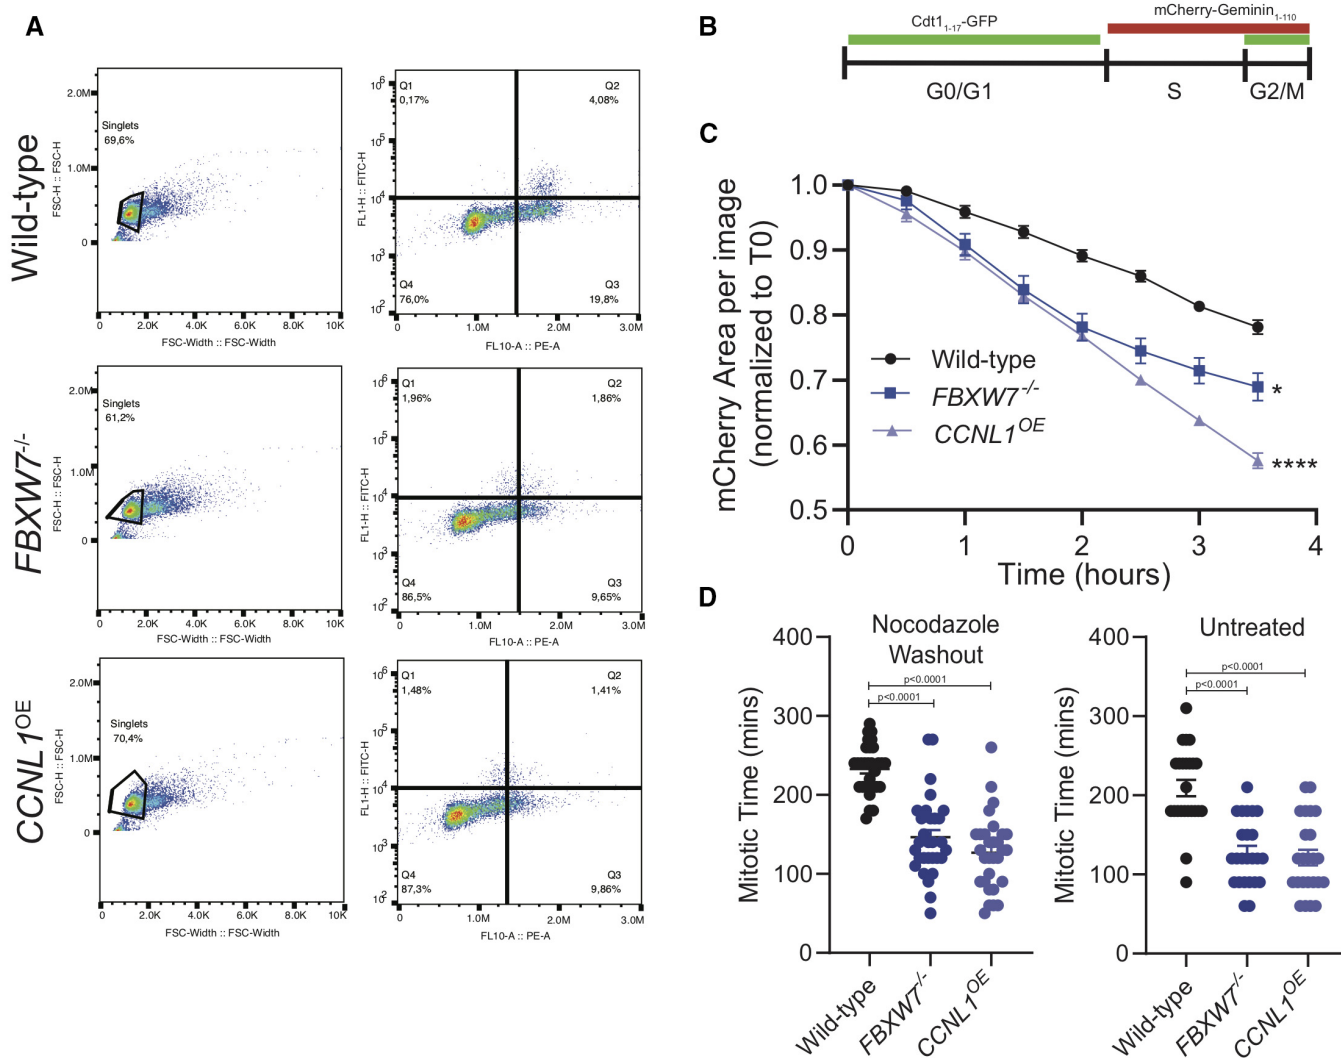

**Figure EV3.** HPAF-II *FBXW7*<sup>-/-</sup> and *CCNL1*<sup>OE</sup> cells exit mitosis faster than wild-type.

A Representative images of gating strategy for HPAF-II wild-type, *FBXW7*<sup>-/-</sup> and *CCNL1*<sup>OE</sup> cells to determine cell cycle distribution.

B Schematic of PIP-FUCCI reporter marker expression through three major cell cycle phases.

C Live-cell imaging of HPAF-II wild-type, *FBXW7*<sup>-/-</sup> and *CCNL1*<sup>OE</sup> cells expressing PIP-FUCCI reporter treated with nocodazole overnight and released. Images collected over 3.5 h. Reduction in total population mCherry expression imaged over time, quantified in the Incucyte. Three independent replicates, mean ± SEM, two-way ANOVA, \**P* = 0.0258, \*\*\*\**P* < 0.0001.

D Live-cell imaging of HPAF-II wild-type, *FBXW7*<sup>-/-</sup> and *CCNL1*<sup>OE</sup> cells expressing PIP-FUCCI reporter either untreated or treated with nocodazole overnight and released. Measurement of individual cells as they lose mCherry expression. *n* = 15 cells per replicate, three independent replicates, one-way ANOVA, mean ± SEM.

**Figure EV4.** Genome-wide chemogenomic screen identifies *CCNL1* and *CDK11* are targets of OTS964.

A Representative gating strategy for HPAF-II wild-type, *FBXW7*<sup>-/-</sup> and *APC*<sup>-/-</sup> cells, with and without LGK974 treatment, to determine cell cycle distribution.

B Representative gating strategy for HPAF-II wild-type, *FBXW7*<sup>-/-</sup> and *CCNL1*<sup>OE</sup> cells, with and without OTS964 treatment, to determine cell cycle distribution.

C Representative images of gating strategy for C33A, Caski, and SiHa cells, with and without OTS964 treatment, to determine cell cycle distribution.

D Normalized Z-score calculated in DrugZ plotted against gene rank for C33A chemogenomic screen with OTS964. Negative score indicates gene knockout synergistic with OTS964; positive score indicates gene knockouts resistant to OTS964. Red line marks the cutoff of FDR < 0.05.

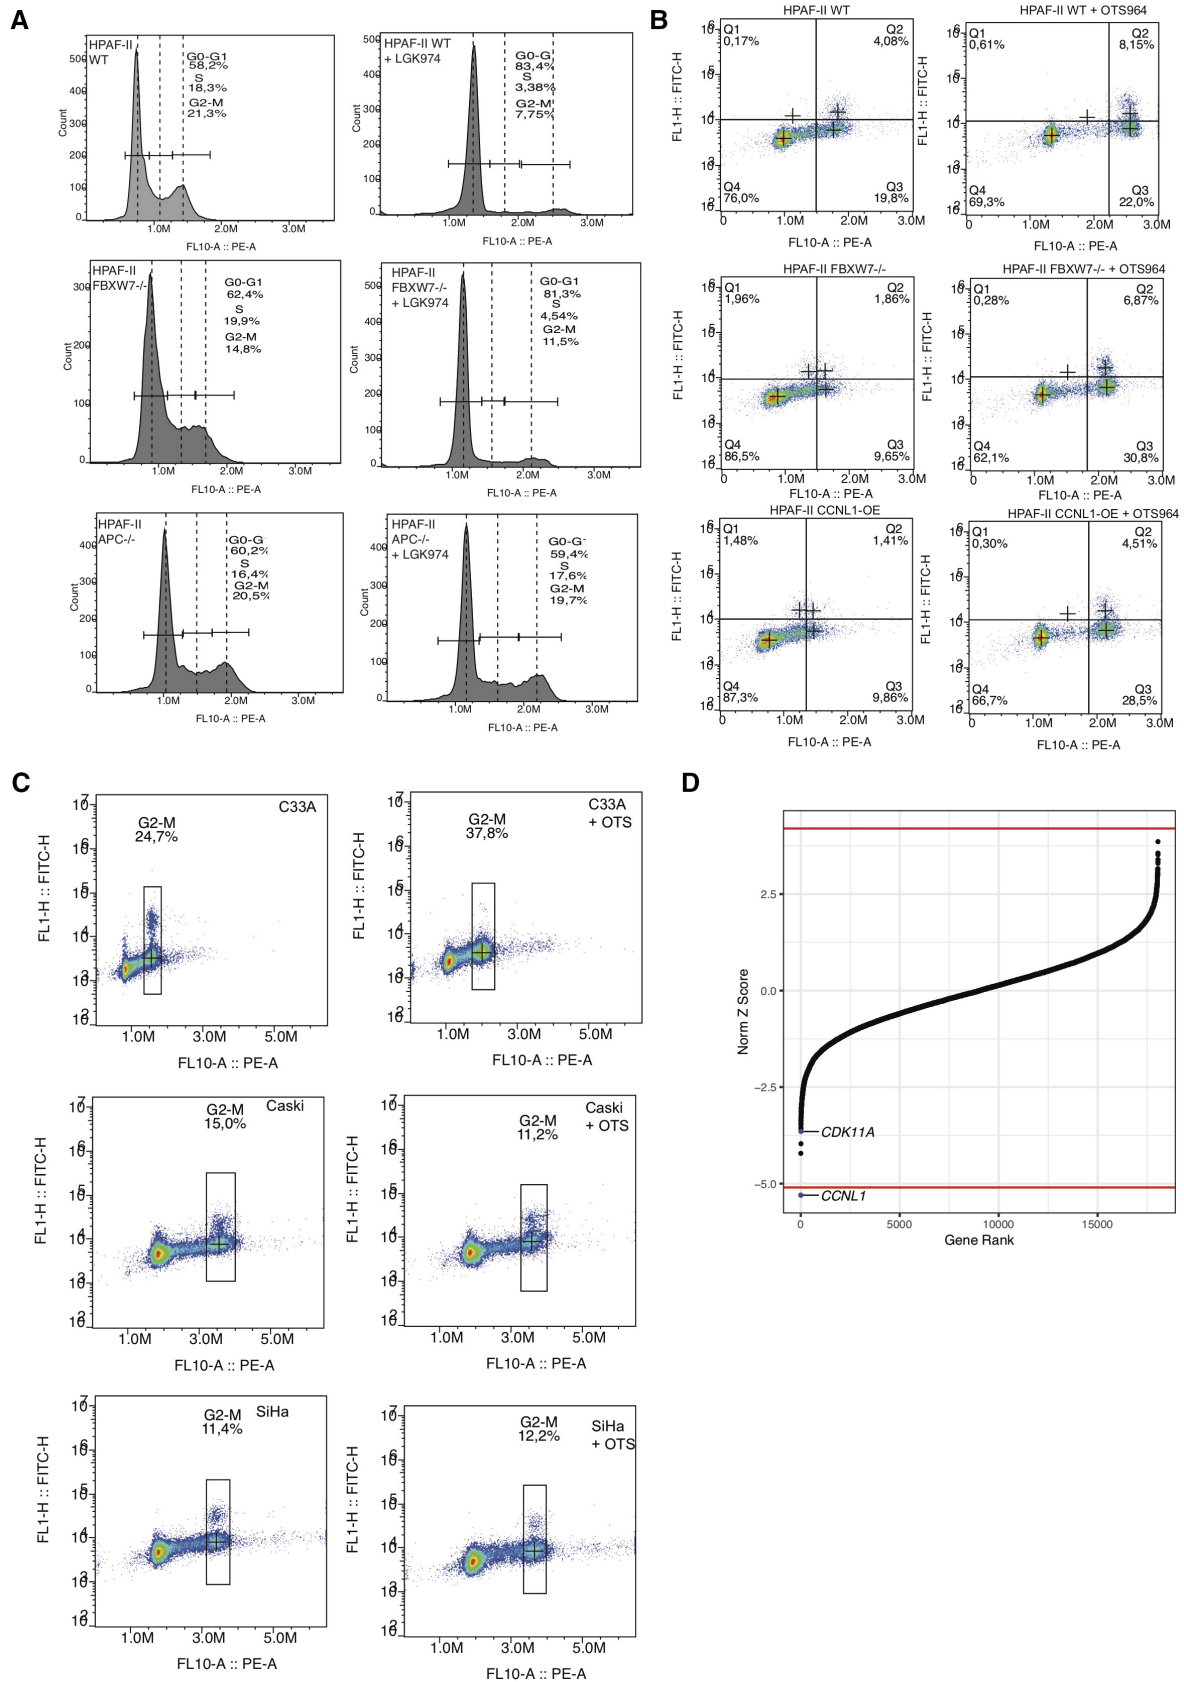

Supplement: EMBR-23-e55044-s003.pdf [file EMBR-23-e55044-s003.pdf]
